# Supplementary material for: Pyridylphosphine supported Ag(i) and Cu(i) complexes for detection of alcohols and nitriles via structural transformations from 1D to 0D
Source: Royal Society of Chemistry journal article supplement (doi:10.1039/c9ce00943d), 2019-01-01
Supplement: c9ce00943d1.pdf [file c9ce00943d1.pdf]

## Electronic Supplementary Information

### Pyridylphosphine supported Ag(I) and Cu(I) complexes for detection of alcohols and nitriles via structural transformations from 1D to 0D

Yue Wang<sup>\*a</sup>, Yongfang Shi<sup>\*b</sup>, Xiaochuan Zou<sup>a</sup>, Yucen He<sup>a</sup>, and Xia Wang<sup>a</sup>

<sup>a</sup> (College of Biological and Chemical Engineering, Chongqing University of Education,

Chongqing 400067, China)

<sup>b</sup> (Fujian Institute of Research on the Structure of Matter, State Key Laboratory of

Structural Chemistry, Chinese Academy of Sciences, Fuzhou 350002, China)

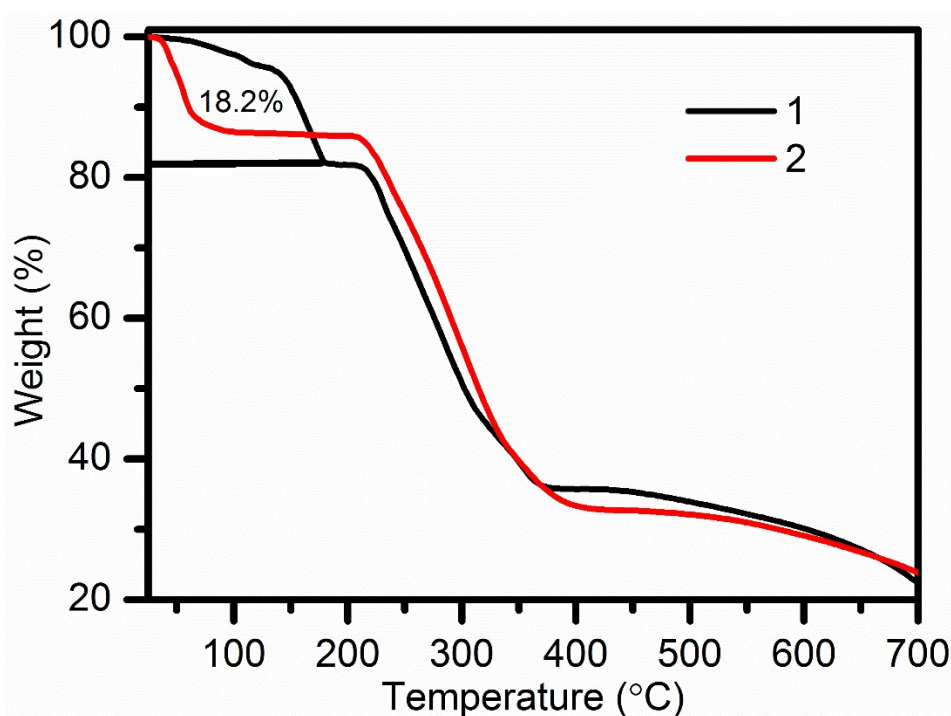

Fig. S1 The TGA curves of the as made samples 1 and 2.

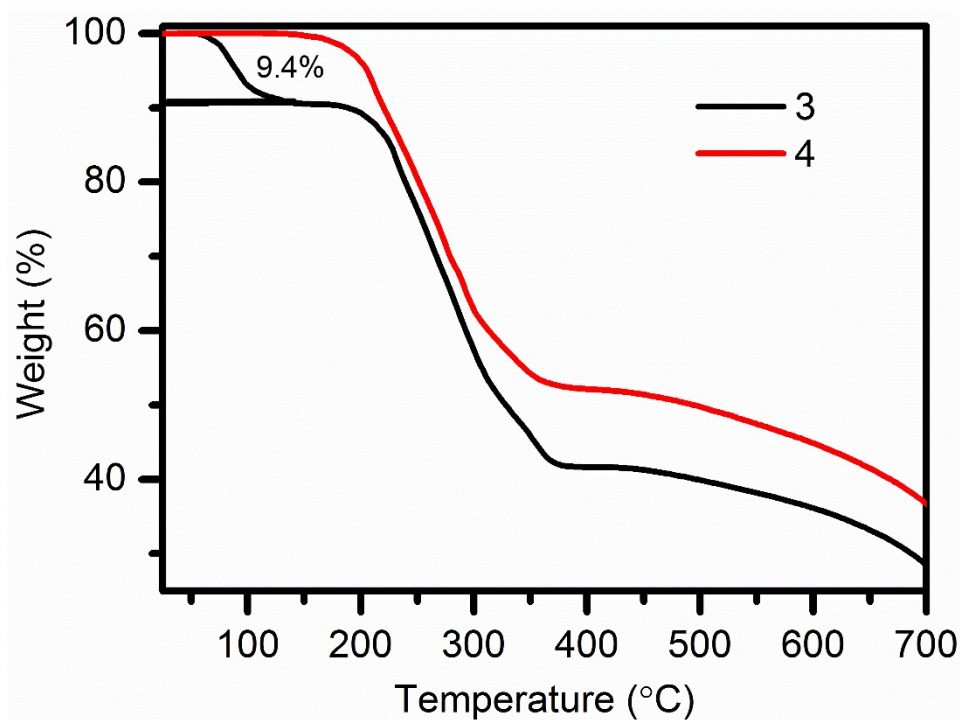

**Fig. S2** The TGA curves of the as made samples 3 and 4.

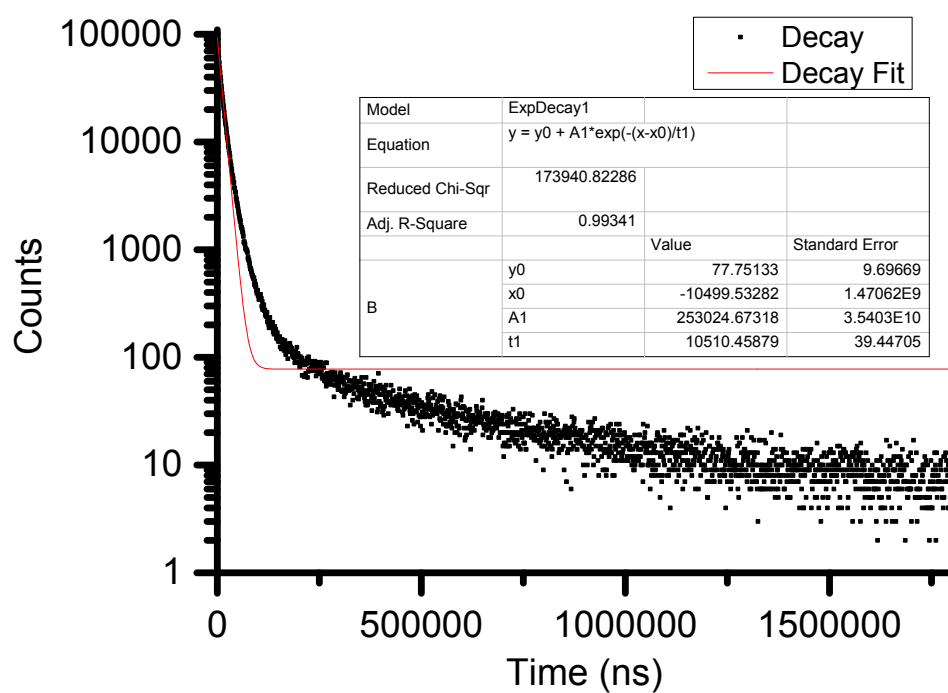

**Fig. S3** Luminescent decay spectrum of complex 2 in solid state at 298 K.

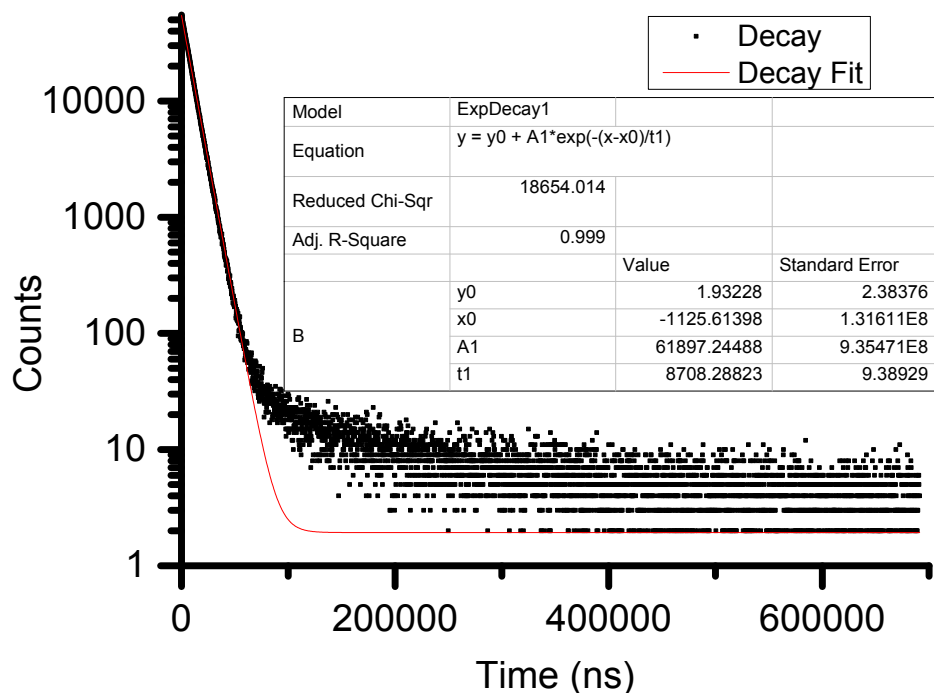

**Fig. S4** Luminescent decay spectrum of complex **4** in solid state at 298 K.

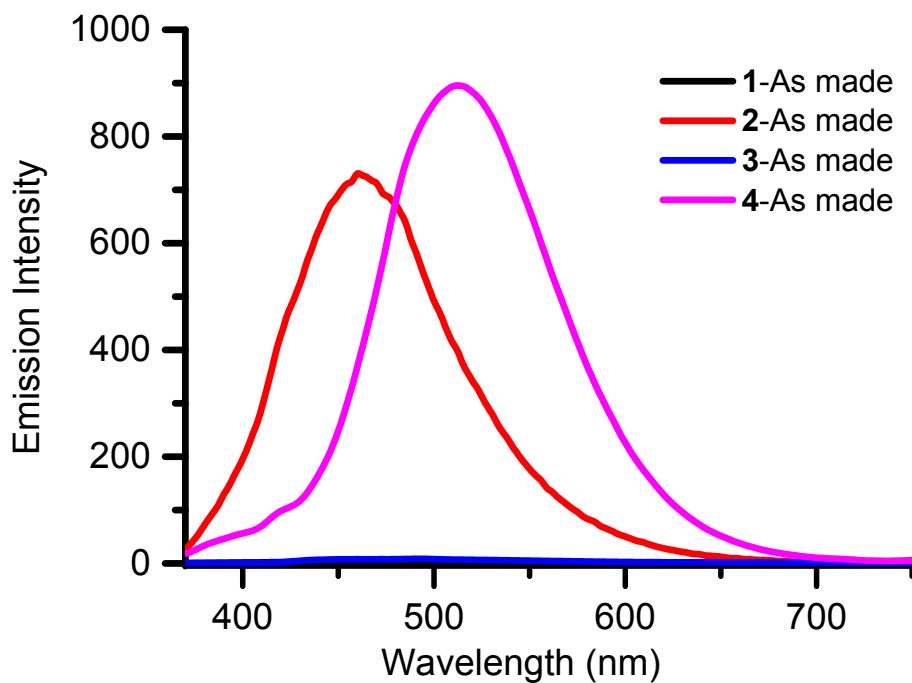

**Fig. S5** Solid-state emission spectra of fresh prepared compound **1–4** at ambient temperature.

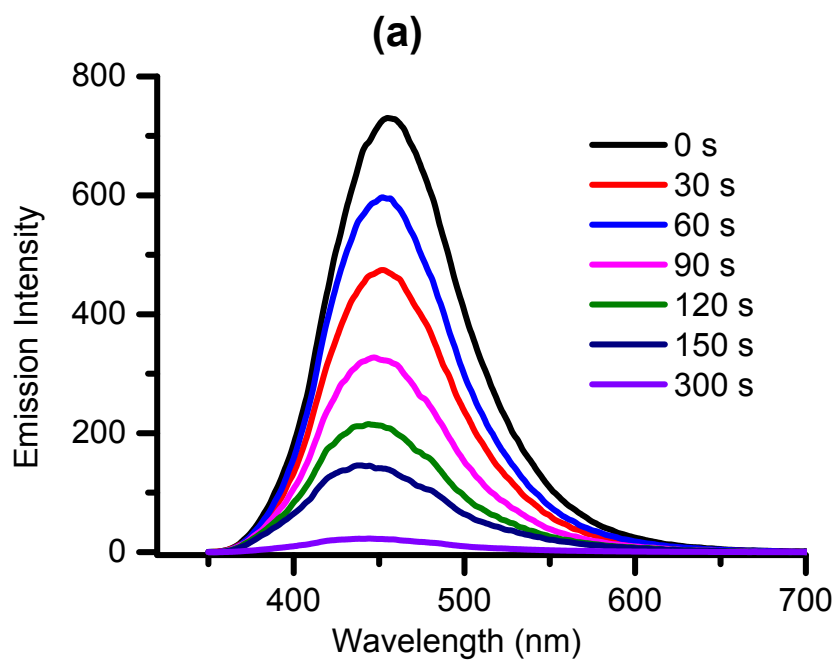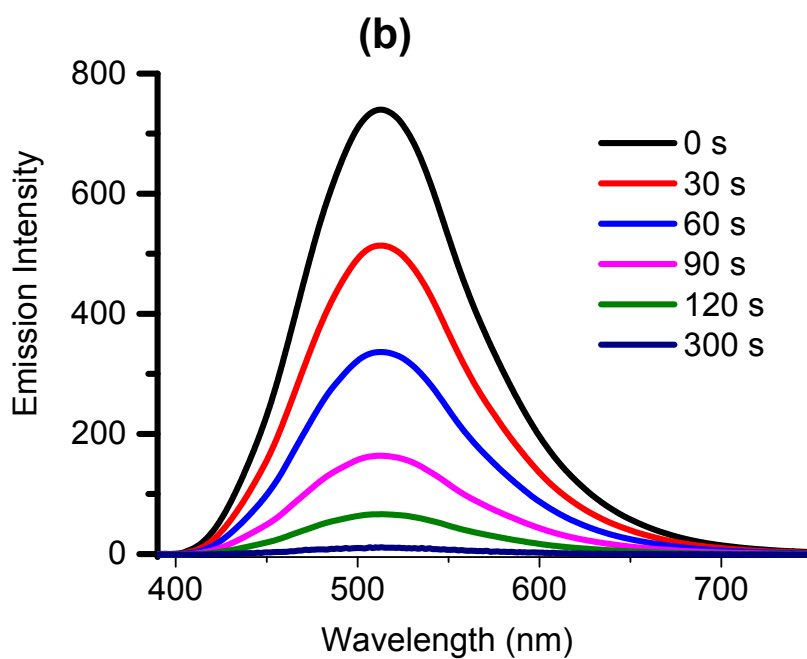

**Fig. S6** The time-dependent emission spectra of fresh prepared samples **2** (a) and **4** (b) in response to MeOH vapor.

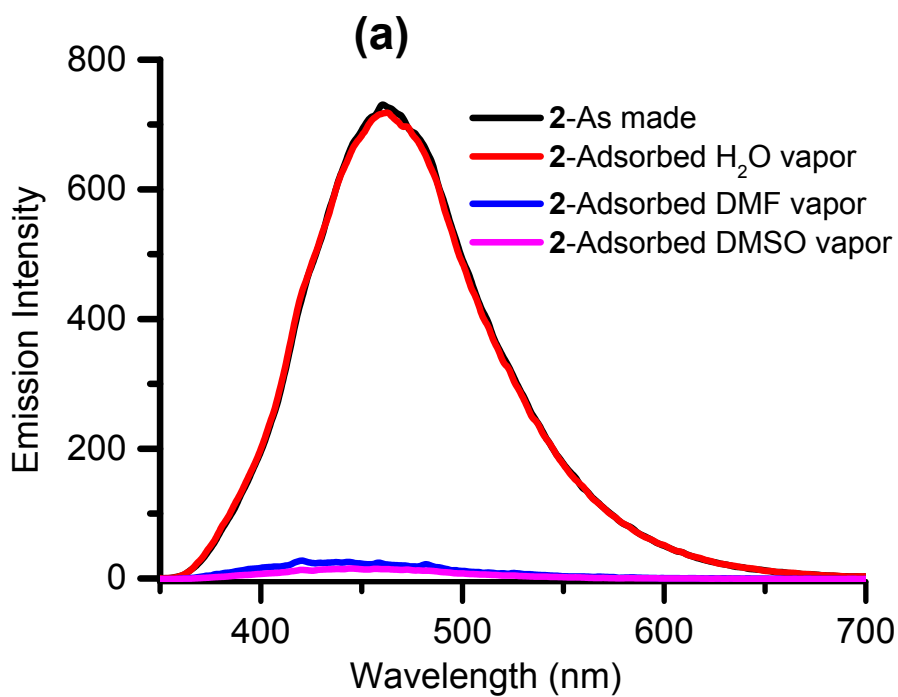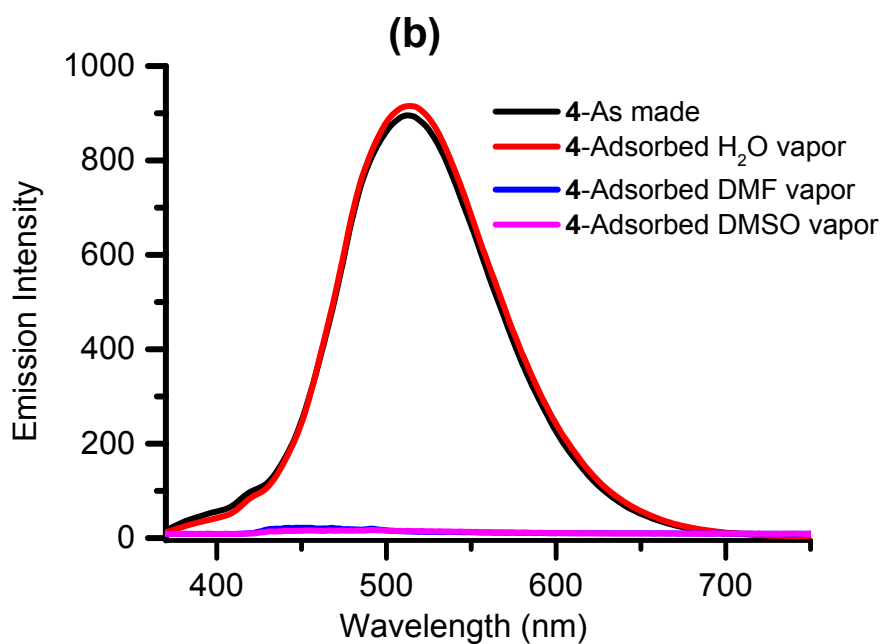

**Fig. S7** Solid-state emission spectra of fresh prepared samples **2** (a) and **4** (b) complex in response to water, DMF and DMSO vapors at ambient temperature.

As Fig. S7 shown, after exposure to H<sub>2</sub>O vapor for several hours, the luminescent quenching of **2** and **4** are not detected. However, after exposure to DMSO and DMF vapors for overnight, the luminescent quenching of **2** and **4** are observed.

**Table S1.** Selected atomic distances (Å) and bond angles (deg) of complex **1**

| Bond          | Dist      | Angle                | Deg        |
|---------------|-----------|----------------------|------------|
| Ag(1)-N(1)    | 2.304(3)  | N(1)-Ag(1)-N(3)      | 102.69(10) |
| Ag(1)-N(3)    | 2.312(3)  | N(1)-Ag(1)-P(1)#1    | 135.91(7)  |
| Ag(1)-P(1)#1  | 2.3993(8) | N(3)-Ag(1)-P(1)#1    | 120.94(8)  |
| Ag(1)-Ag(1)#1 | 3.3458(5) | N(1)-Ag(1)-Ag(1)#1   | 82.58(7)   |
| Ag(2)-N(2)    | 2.284(3)  | N(3)-Ag(1)-Ag(1)#1   | 118.68(8)  |
| Ag(2)-N(4)    | 2.322(3)  | P(1)#1-Ag(1)-Ag(1)#1 | 71.79(2)   |
| Ag(2)-P(2)#2  | 2.3943(8) | N(2)-Ag(2)-N(4)      | 108.04(10) |
| Ag(2)-N(5)    | 2.574(4)  | N(2)-Ag(2)-P(2)#2    | 134.45(7)  |
| Ag(2)-Ag(2)#2 | 3.3533(5) | N(4)-Ag(2)-P(2)#2    | 117.25(8)  |
|               |           | N(2)-Ag(2)-N(5)      | 89.30(12)  |
|               |           | N(4)-Ag(2)-N(5)      | 87.27(14)  |
|               |           | P(2)#2-Ag(2)-N(5)    | 97.07(12)  |
|               |           | N(2)-Ag(2)-Ag(2)#2   | 83.99(7)   |
|               |           | N(4)-Ag(2)-Ag(2)#2   | 121.40(8)  |
|               |           | P(2)#2-Ag(2)-Ag(2)#2 | 69.12(2)   |
|               |           | N(5)-Ag(2)-Ag(2)#2   | 151.24(11) |
|               |           | C(7)-P(1)-Ag(1)#1    | 112.79(11) |
|               |           | C(1)-P(1)-Ag(1)#1    | 115.72(11) |
|               |           | C(13)-P(1)-Ag(1)#1   | 115.14(10) |
|               |           | C(24)-P(2)-Ag(2)#2   | 113.80(11) |
|               |           | C(18)-P(2)-Ag(2)#2   | 112.91(12) |
|               |           | C(30)-P(2)-Ag(2)#2   | 116.28(10) |

**Table S2.** Selected atomic distances (Å) and bond angles (deg) of complex **2**

| Bond        | Dist       | Angle            | Deg        |
|-------------|------------|------------------|------------|
| Ag(1)-N(2)  | 2.200(3)   | N(2)-Ag(1)-P(1)  | 168.33(9)  |
| Ag(1)-P(1)  | 2.3699(10) | N(2)-Ag(1)-Ag(2) | 89.88(8)   |
| Ag(1)-Ag(2) | 3.0291(4)  | P(1)-Ag(1)-Ag(2) | 78.46(3)   |
| Ag(2)-N(1)  | 2.202(3)   | N(1)-Ag(2)-P(2)  | 161.09(9)  |
| Ag(2)-P(2)  | 2.3652(10) | N(1)-Ag(2)-O(1)  | 90.14(11)  |
| Ag(2)-O(1)  | 2.566(3)   | P(2)-Ag(2)-O(1)  | 108.10(8)  |
|             |            | N(1)-Ag(2)-Ag(1) | 89.19(9)   |
|             |            | P(2)-Ag(2)-Ag(1) | 73.70(2)   |
|             |            | O(1)-Ag(2)-Ag(1) | 140.04(7)  |
|             |            | C(29)-P(1)-Ag(1) | 110.40(14) |
|             |            | C(1)-P(1)-Ag(1)  | 116.93(13) |
|             |            | C(7)-P(1)-Ag(1)  | 115.80(14) |
|             |            | C(23)-P(2)-Ag(2) | 107.23(13) |
|             |            | C(12)-P(2)-Ag(2) | 119.46(13) |
|             |            | C(18)-P(2)-Ag(2) | 116.08(13) |
|             |            | Cl(1)-O(1)-Ag(2) | 111.36(16) |
|             |            | C(11)-N(1)-Ag(2) | 116.7(3)   |
|             |            | C(7)-N(1)-Ag(2)  | 125.3(3)   |
|             |            | C(22)-N(2)-Ag(1) | 120.0(3)   |
|             |            | C(18)-N(2)-Ag(1) | 121.4(3)   |

**Table S3.** Selected atomic distances (Å) and bond angles (deg) of complex **3**

| Bond         | Dist       | Angle              | Deg        |
|--------------|------------|--------------------|------------|
| Cu(1)-N(2)   | 1.9537(17) | N(2)-Cu(1)-N(1)    | 100.91(7)  |
| Cu(1)-N(1)   | 2.0368(16) | N(2)-Cu(1)-P(1)#1  | 129.79(5)  |
| Cu(1)-P(1)#1 | 2.1956(5)  | N(1)-Cu(1)-P(1)#1  | 125.27(5)  |
|              |            | C(1)-P(1)-Cu(1)#1  | 113.42(6)  |
|              |            | C(7)-P(1)-Cu(1)#1  | 113.22(6)  |
|              |            | C(13)-P(1)-Cu(1)#1 | 115.99(6)  |
|              |            | C(17)-N(1)-Cu(1)   | 120.42(13) |
|              |            | C(13)-N(1)-Cu(1)   | 121.33(12) |
|              |            | C(18)-N(2)-Cu(1)   | 165.53(17) |

**Table S4.** Selected atomic distances (Å) and bond angles (deg) of complex **4**

| Bond         | Dist       | Angle              | Deg        |
|--------------|------------|--------------------|------------|
| Cu(1)-O(1)   | 2.1742(15) | O(1)-Cu(1)-O(5)    | 91.78(6)   |
| Cu(1)-O(5)   | 2.1876(15) | O(1)-Cu(1)-P(1)    | 110.26(5)  |
| Cu(1)-P(1)   | 2.2435(6)  | O(5)-Cu(1)-P(1)    | 107.16(5)  |
| Cu(1)-P(2)   | 2.2527(6)  | O(1)-Cu(1)-P(2)    | 111.47(5)  |
| Cu(2)-N(2)   | 1.9103(18) | O(5)-Cu(1)-P(2)    | 102.22(4)  |
| Cu(2)-N(1)   | 1.9111(18) | P(1)-Cu(1)-P(2)    | 127.31(2)  |
| Cu(2)-O(7)#1 | 2.3172(16) | N(2)-Cu(2)-N(1)    | 165.69(8)  |
|              |            | N(2)-Cu(2)-O(7)#1  | 93.76(7)   |
|              |            | N(1)-Cu(2)-O(7)#1  | 100.42(7)  |
|              |            | C(7)-P(1)-Cu(1)    | 121.70(7)  |
|              |            | C(1)-P(1)-Cu(1)    | 113.60(7)  |
|              |            | C(13)-P(1)-Cu(1)   | 110.27(7)  |
|              |            | C(24)-P(2)-Cu(1)   | 119.72(7)  |
|              |            | C(18)-P(2)-Cu(1)   | 116.67(7)  |
|              |            | C(30)-P(2)-Cu(1)   | 104.95(7)  |
|              |            | Cl(1)-O(1)-Cu(1)   | 114.20(9)  |
|              |            | Cl(2)-O(5)-Cu(1)   | 127.41(9)  |
|              |            | Cl(2)-O(7)-Cu(2)#2 | 133.50(11) |
|              |            | C(17)-N(1)-Cu(2)   | 121.71(15) |
|              |            | C(13)-N(1)-Cu(2)   | 119.13(14) |
|              |            | C(34)-N(2)-Cu(2)   | 121.24(15) |
|              |            | C(30)-N(2)-Cu(2)   | 119.80(14) |
